# Supplementary material
Source: PubMed Central journal article supplement (PMC9069718)

# Figure S1

## Non-reducing SDS-PAGE (14%)

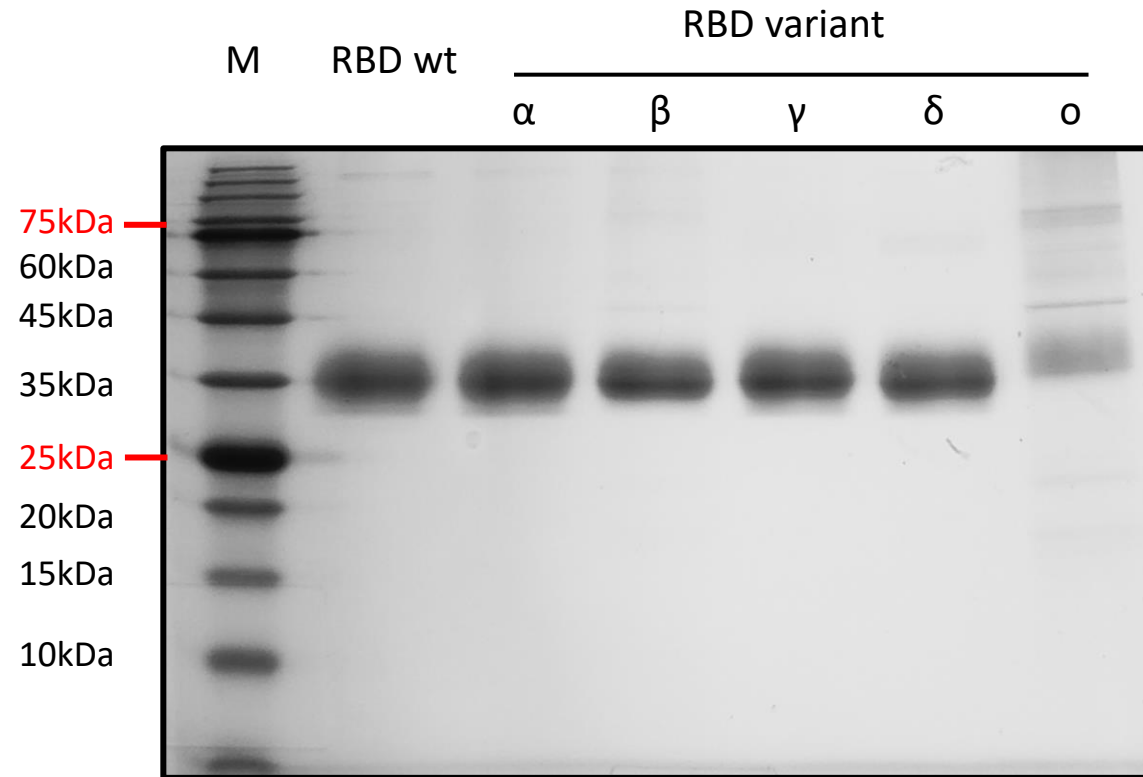

## Reducing SDS-PAGE (14%)

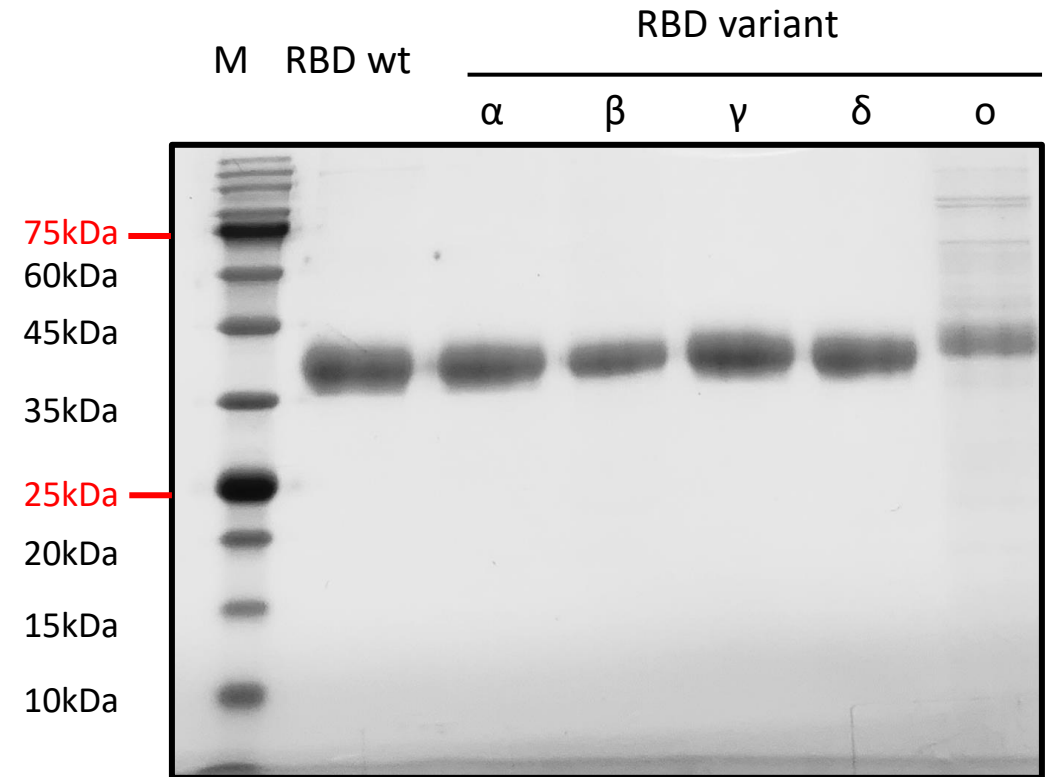

Supplement: 12916_2022_2383_MOESM1_ESM.pdf [file 12916_2022_2383_MOESM1_ESM.pdf]
